# Supplementary material for: Root Abscisic Acid Contributes to Defending Photoinibition in Jerusalem Artichoke (Helianthus tuberosus L.) under Salt Stress
Source: MDPI journal article supplement (doi:10.3390/ijms19123934), 2018-12-07
Supplement: s1 [file s1]

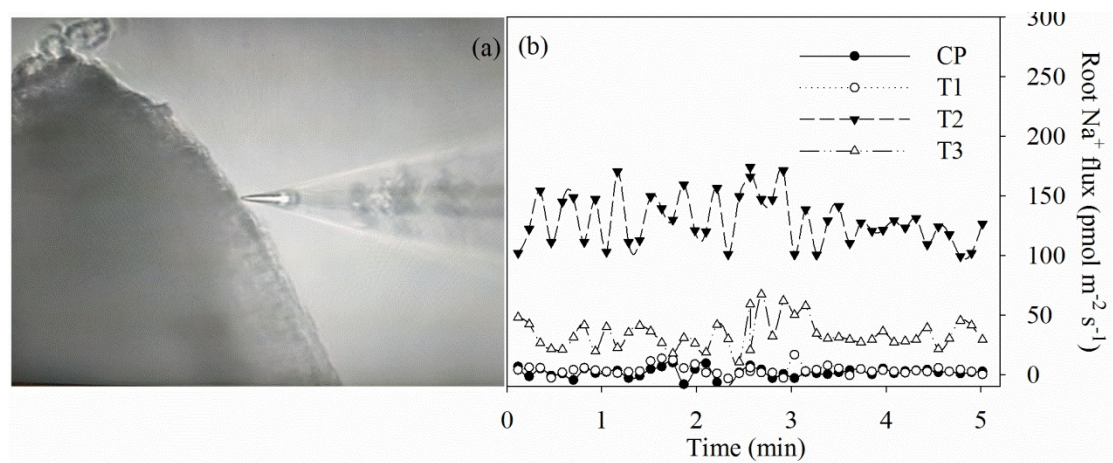

Figure S1. The non-invasive ion-selective electrode closed to the root (a) and net  $\text{Na}^+$  fluxes at the point of 500  $\mu\text{m}$  from root apex (b).  $\text{Na}^+$  fluxes were measured for 5 min, and each point is the mean of five replicate plants.
